# Supplementary material for: A tailored polyoxometalate-derived RuW/g-C3N4-based electrocatalyst for enhanced hydrogen evolution reaction
Source: Royal Society of Chemistry journal article supplement (doi:10.1039/d3ma01010d), 2023-11-21
Supplement: d3ma01010d1.pdf [file d3ma01010d1.pdf]

## Tailored Polyoxometalate derived Ru-W/g-C<sub>3</sub>N<sub>4</sub> based Electrocatalyst for Enhanced Hydrogen Evolution Reaction

Soyeb Pathan<sup>\*a,b</sup> Menon Ankitha<sup>c</sup> Ajith Mohan Arjun<sup>d</sup> Neermunda Shabana <sup>c</sup> Yongfeng Tong <sup>e</sup>  
and P Abdul Rasheed<sup>\*,c,d</sup>

<sup>a</sup>Research and Development Cell (RDC), Parul Institute of Applied Sciences, Parul University, Waghodia, Vadodara, Gujarat, India-391760.

<sup>b</sup>Department of Chemistry, Parul Institute of Applied Sciences, Parul University, Waghodia, Vadodara, Gujarat, India-391760.

<sup>c</sup>Department of Chemistry, Indian Institute of Technology Palakkad, Palakkad, Kerala, India-678 557.

<sup>d</sup>Department of Biological Sciences and Engineering, Indian Institute of Technology Palakkad, Palakkad, Kerala, India-678 557.

<sup>e</sup>Qatar Environment and Energy Research Institute, Hamad Bin Khalifa University, Doha, P.O. box 5825, Qatar.

<sup>\*</sup> (SP) Email: [khan\\_9751@yahoo.com](mailto:khan_9751@yahoo.com)

<sup>\*</sup> (PAR) Email: [abdulrasheed@iitpkd.ac.in](mailto:abdulrasheed@iitpkd.ac.in)

**Supplementary Information**

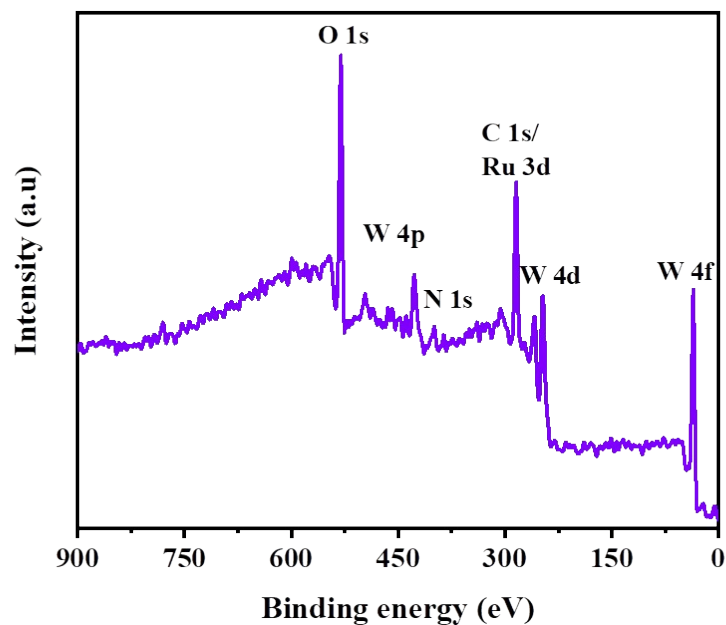

Fig S1. The XPS survey spectra of RuW/g-C<sub>3</sub>N<sub>4</sub> composite.

| Sample code                         | Element symbol and Wavelength (nm) | Weight of sample in gms / Volume in ml | Dilution Factor | Concn.in ppm $\mu\text{g/ml}$ (or) mg/litre |
|-------------------------------------|------------------------------------|----------------------------------------|-----------------|---------------------------------------------|
| RuW/g-C <sub>3</sub> N <sub>4</sub> | Ru 240.272                         | 0.0250g/50ml                           | 1               | 18.51 mg/L                                  |
|                                     | W 207.912                          | 0.0250g/50ml                           | 1               | 297.7 mg/L                                  |

Table S1. ICP analysis data of RuW/g-C<sub>3</sub>N<sub>4</sub> composite

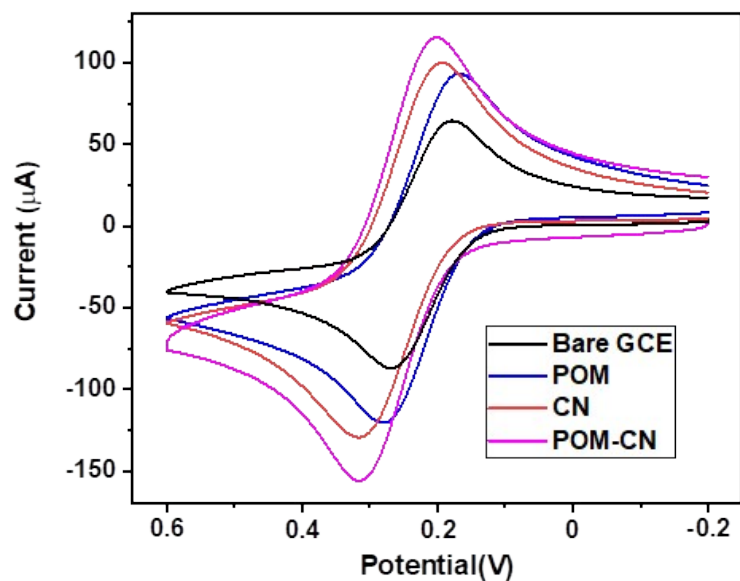

Fig. S2. Cyclic voltammogram of GCE modified with  $PW_{11}Ru$ ,  $g-C_3N_4$  and  $RuW/g-C_3N_4$  composite. The analysis was done in the solution containing 0.1 M KCl with 10 mM  $[Fe(CN)_6]^{3-}$  at a scan rate of  $100 \text{ mVs}^{-1}$ .

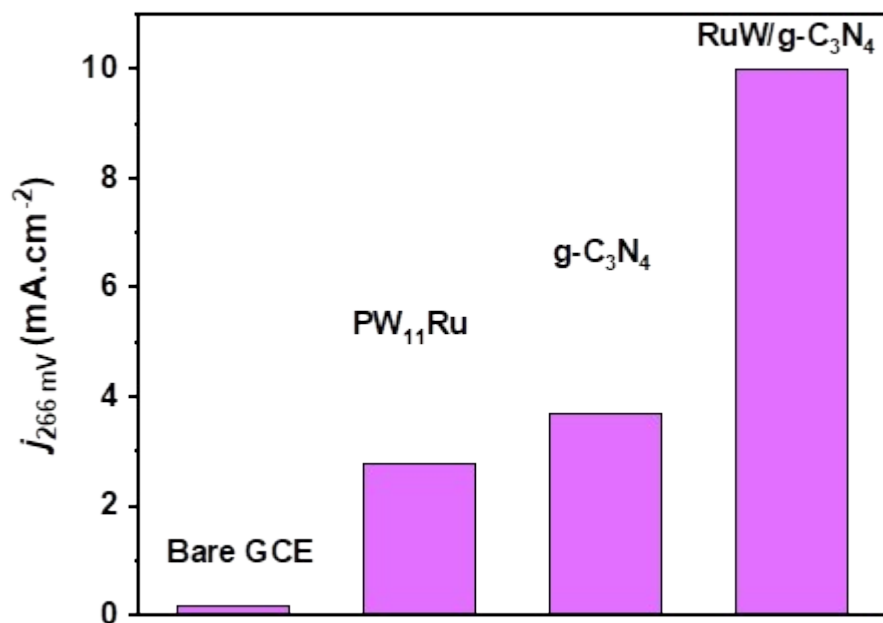

Fig. S3. Current density at 266 mV for  $PW_{11}Ru$ ,  $g-C_3N_4$  and  $RuW/g-C_3N_4$  composite.

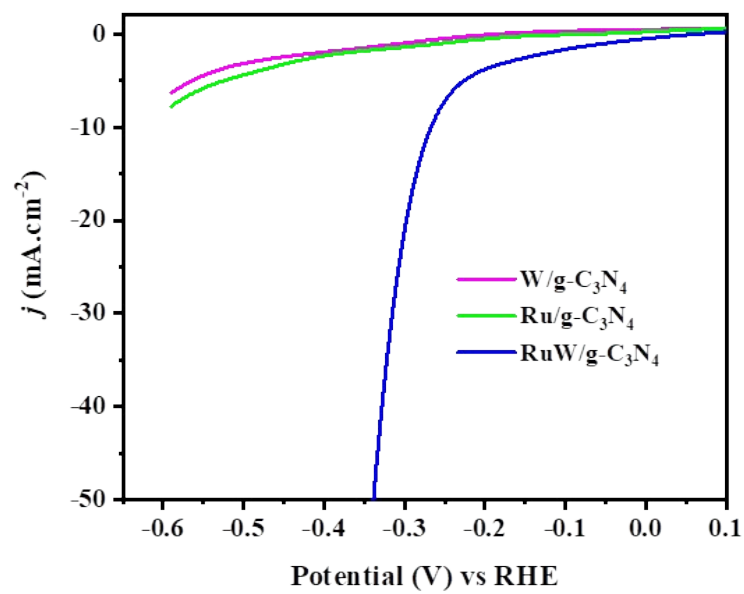

Fig. S4. HER polarization curve of Ru/g-C<sub>3</sub>N<sub>4</sub> and W/g-C<sub>3</sub>N<sub>4</sub> in comparison with RuW/g-C<sub>3</sub>N<sub>4</sub> and Pt/C.
